# Supplementary material
Source: publisher figshare collection journal article supplement (https://gsapubs.figshare.com/ndownloader/files/24623939)
Supplement: Supplementary file 1 [file 24623939]

## Sheet: Sheet1
Zuza-NBMG, LC 12a, Basalt Groundmass, 26.59 mg, J = 0.00166 ± 0.40%
4 amu discrimination = 1.0313 ± 0.07%, 40/39K = 0.0322 ± 6.64%, 36/37Ca = 0.000233 ± 0.83%, 39/37Ca = 0.000682 ± 0.65%
step	T (C)	t (min.)	36Ar	37Ar	38Ar	39Ar	40Ar	%40Ar*	% 39Ar rlsd	Ca/K	40Ar*/39ArK	Age (Ma)	1s.d.
1	700	12	6.21	33.014	1.906	38.636	2166.42	18	6.8	3.76185	10.1505	30.15	0.43
2	770	12	0.585	18.735	0.728	41.809	285.282	43.9	7.4	1.97174	2.82451	8.44	0.1
3	840	12	0.997	25.464	0.951	48.293	452.716	38.5	8.5	2.32035	3.49216	10.43	0.1
4	890	12	0.774	34.802	0.841	42.75	344.28	38	7.5	3.58378	2.92651	8.74	0.08
5	940	12	0.42	26.96	0.868	40.813	229.772	51.7	7.2	2.90742	2.63969	7.89	0.11
6	990	12	0.23	20.013	0.978	42.63	167.217	67.8	7.5	2.06573	2.31212	6.91	0.07
7	1030	12	0.234	22.327	1.226	50.771	176.912	69.1	8.9	1.93498	2.11204	6.31	0.03
8	1070	12	0.24	25.526	1.454	58.494	184.066	69.5	10.3	1.92013	1.93011	5.77	0.04
9	1110	12	0.173	26.986	1.301	51.247	156.476	78	9	2.31729	2.04636	6.12	0.04
10	1150	12	0.111	43.353	0.729	30.384	95.077	99.7	5.3	6.28629	2.22966	6.67	0.11
11	1210	12	0.488	149.643	1.676	60.576	272.452	61.1	10.7	10.8985	2.49952	7.47	0.05
12	1400	12	0.551	185.201	1.752	62.235	291.218	63.3	10.9	13.1374	2.48108	7.42	0.07
								Cumulative %39Ar rlsd =	100		Total gas age =	8.97	0.03
note: isotope beams in mV, rlsd = released, error in age includes J error, all errors 1 sigma											No plateau
(36Ar through 40Ar are measured beam intensities, corrected for decay for the age calculations)											No isochron
